# Supplementary material for: New biomarkers underlying acetic acid tolerance in the probiotic yeast Saccharomyces cerevisiae var. boulardii
Source: PubMed Central journal article supplement (PMC10799125; doi:10.1007/s00253-023-12946-x), 2024-01-19
Supplement: 253_2023_12946_MOESM1_ESM.pdf [file 253_2023_12946_MOESM1_ESM.pdf]

## Supplemental Material

### Applied Microbiology and Biotechnology

#### New biomarkers underlying acetic acid tolerance in the probiotic yeast *Saccharomyces cerevisiae* var. *boulardii*

Wiwat Samakkarn<sup>1</sup>, Paul Vandecruys<sup>2,3</sup>, Maria Remedios Foulquié Moreno<sup>2,3</sup>, Johan Thevelein<sup>2,3,4</sup>,  
Khanok Ratanakhanokchai<sup>1,5</sup>, and Nitnipa Soontornngun<sup>1\*</sup>

<sup>1</sup>Gene Technology Laboratory, Division of Biochemical Technology, School of Bioresources and Technology, King Mongkut's University of Technology Thonburi, Bangkhuntian- Chai Thale Rd., Tha Kham, Bangkhuntian, Bangkok 10150, Thailand.

<sup>2</sup>Laboratory of Molecular Cell Biology, Institute of Botany and Microbiology, KU Leuven, Leuven-Heverlee, Belgium.

<sup>3</sup>Center for Microbiology, VIB, Kasteelpark Arenberg 31, B-3001, Leuven-Heverlee, Flanders, Belgium.

<sup>4</sup>NovelYeast Bv, Open Bio-Incubator, Erasmus High School, Laarbeeklaan 121, B-1090, Brussels (Jette), Belgium.

<sup>5</sup>Pilot Plant Development and Training Institute, King Mongkut's University of Technology Thonburi, Bangkhuntian- Chai Thale Rd., Tha Kham, Bangkhuntian, Bangkok 10150, Thailand.

\* E-mail: [nitnipa.soo@kmutt.ac.th](mailto:nitnipa.soo@kmutt.ac.th), Telephone number: (+66)2-470-7753, Fax number: (+66)2-452-3479

**Table S1** Primers for RT-qPCR analysis used in this study

| <b>Purpose</b>          | <b>Gene</b>  | <b>Primer sequence(s) (5' to 3')</b>                                                                   |
|-------------------------|--------------|--------------------------------------------------------------------------------------------------------|
| Endocytosis             | <i>PAN1</i>  | AGCAAGCACAGTCCTTGC and<br>CACCGGAAACAGTATTCGAACC                                                       |
|                         | <i>SLA1</i>  | ACCAAGCTCCAGATGAGGA and<br>CCTCGATTTTCGGTAACGTTCC                                                      |
|                         | <i>END3</i>  | GCAGACTTGCCTCCAAAGAA and<br>CTCCGCCAGAGAATTTGGT                                                        |
| Signaling/MAPK          | <i>TOR1</i>  | GCAGCCTCATCTGGTTACG and<br>GAGACATGCCCTGCATGAG                                                         |
|                         | <i>SMI1</i>  | ATCACTCACGCAGAGGAAGA and<br>GTGCATATAACCGTTGCACT                                                       |
| Fatty acid biosynthesis | <i>OLE1</i>  | CATCTCCGAACAACCATGGA and<br>ATCTCAATGGCCAGTGAGC                                                        |
| Glycerol biosynthesis   | <i>GPD1</i>  | GTGGGTGTTCGAAGAAGAG and ACAGGAGATAGCTCTGACG                                                            |
|                         | <i>GPP1</i>  | GAAGTTCCAGGTGCTGTC and CGTTGTATTCACCGACTC                                                              |
| Transporter activity    | <i>VBA5</i>  | GGCTCGTTACAGGCTACAG and TCACCAATGGACGTGACC                                                             |
|                         | <i>FRE7</i>  | GTCTGTTCGTGCAGGCATAA and                                                                               |
|                         | <i>YPT53</i> | GTCTTCTAGCAATAGGCAGCG                                                                                  |
|                         | <i>OPT2</i>  | AACCTACTATTGGTGCCGC and AGTCTTAGCGCTTGCTTCG                                                            |
|                         | <i>ADE17</i> | CGGAAGACGTTGCGTATATCC and<br>CGGAATGTCTCCACTGGAAT<br>GTGTGACTATTCCAGAAGCCG and<br>TGTGGATTGGCACCATAACG |

**Table S2** Mapped data stats of *S. boulardii*

| <b>Strain</b>              | <b>Ref. length</b> | <b>Mapped sites (<math>\geq 1x</math>)</b> | <b>Total reads</b> | <b>Mapped reads</b>   | <b>Mapped bases</b> | <b>Mean depth</b> |
|----------------------------|--------------------|--------------------------------------------|--------------------|-----------------------|---------------------|-------------------|
| <b>Enterol (ancestral)</b> | 12,001,065         | 11,966,515<br>(99.71 %)                    | 6,326,040          | 5,383,980<br>(85.11%) | 751,552,975         | 62.62             |
| <b>Enterol ev16</b>        | 12,001,065         | 11,966,699<br>(99.71 %)                    | 6,691,164          | 6,223,777<br>(93.01%) | 877,736,951         | 73.14             |
| <b>Enterol ev17</b>        | 12,001,065         | 11,968,794<br>(99.73 %)                    | 6,927,114          | 5,913,452<br>(85.37%) | 831,147,204         | 69.26             |

**Table S3** Raw data stats of *S. boulardii* bases sequenced

| <b>Strain</b>                  | <b>Total read base<br/>(bp)</b> | <b>Total reads</b> | <b>GC (%)</b> | <b>Q20 (%)</b> | <b>Q30 (%)</b> |
|--------------------------------|---------------------------------|--------------------|---------------|----------------|----------------|
| <b>Enterol<br/>(ancestral)</b> | 1,206,462,216                   | 7,989,816          | 37.93         | 96.63          | 92.70          |
| <b>Enterol ev16</b>            | 1,097,931,570                   | 7,271,070          | 36.65         | 96.75          | 92.82          |
| <b>Enterol ev17</b>            | 1,168,264,350                   | 7,736,850          | 37.63         | 96.65          | 92.57          |

**Table S4** Filtered data stats of *S. boulardii* bases sequenced

| <b>Strain</b>                  | <b>Total read base<br/>(bp)</b> | <b>Total reads</b> | <b>GC (%)</b> | <b>Q20 (%)</b> | <b>Q30 (%)</b> |
|--------------------------------|---------------------------------|--------------------|---------------|----------------|----------------|
| <b>Enterol<br/>(ancestral)</b> | 1,007,457,971                   | 6,927,114          | 37.55         | 99.11          | 97.07          |
| <b>Enterol ev16</b>            | 918,284,036                     | 6,326,040          | 36.27         | 99.09          | 97.00          |
| <b>Enterol ev17</b>            | 970,684,577                     | 6,691,164          | 37.34         | 99.07          | 96.95          |

**Table S5** Summary of variant count of *S. boulardii*

| <b>Strain</b>              | <b>Number of SNPs</b> | <b>Number of insertions</b> | <b>Number of deletions</b> |
|----------------------------|-----------------------|-----------------------------|----------------------------|
| <b>Enterol (ancestral)</b> | 1,942                 | 565                         | 122                        |
| <b>Enterol ev16</b>        | 1,898                 | 573                         | 130                        |
| <b>Enterol ev17</b>        | 1,965                 | 576                         | 125                        |

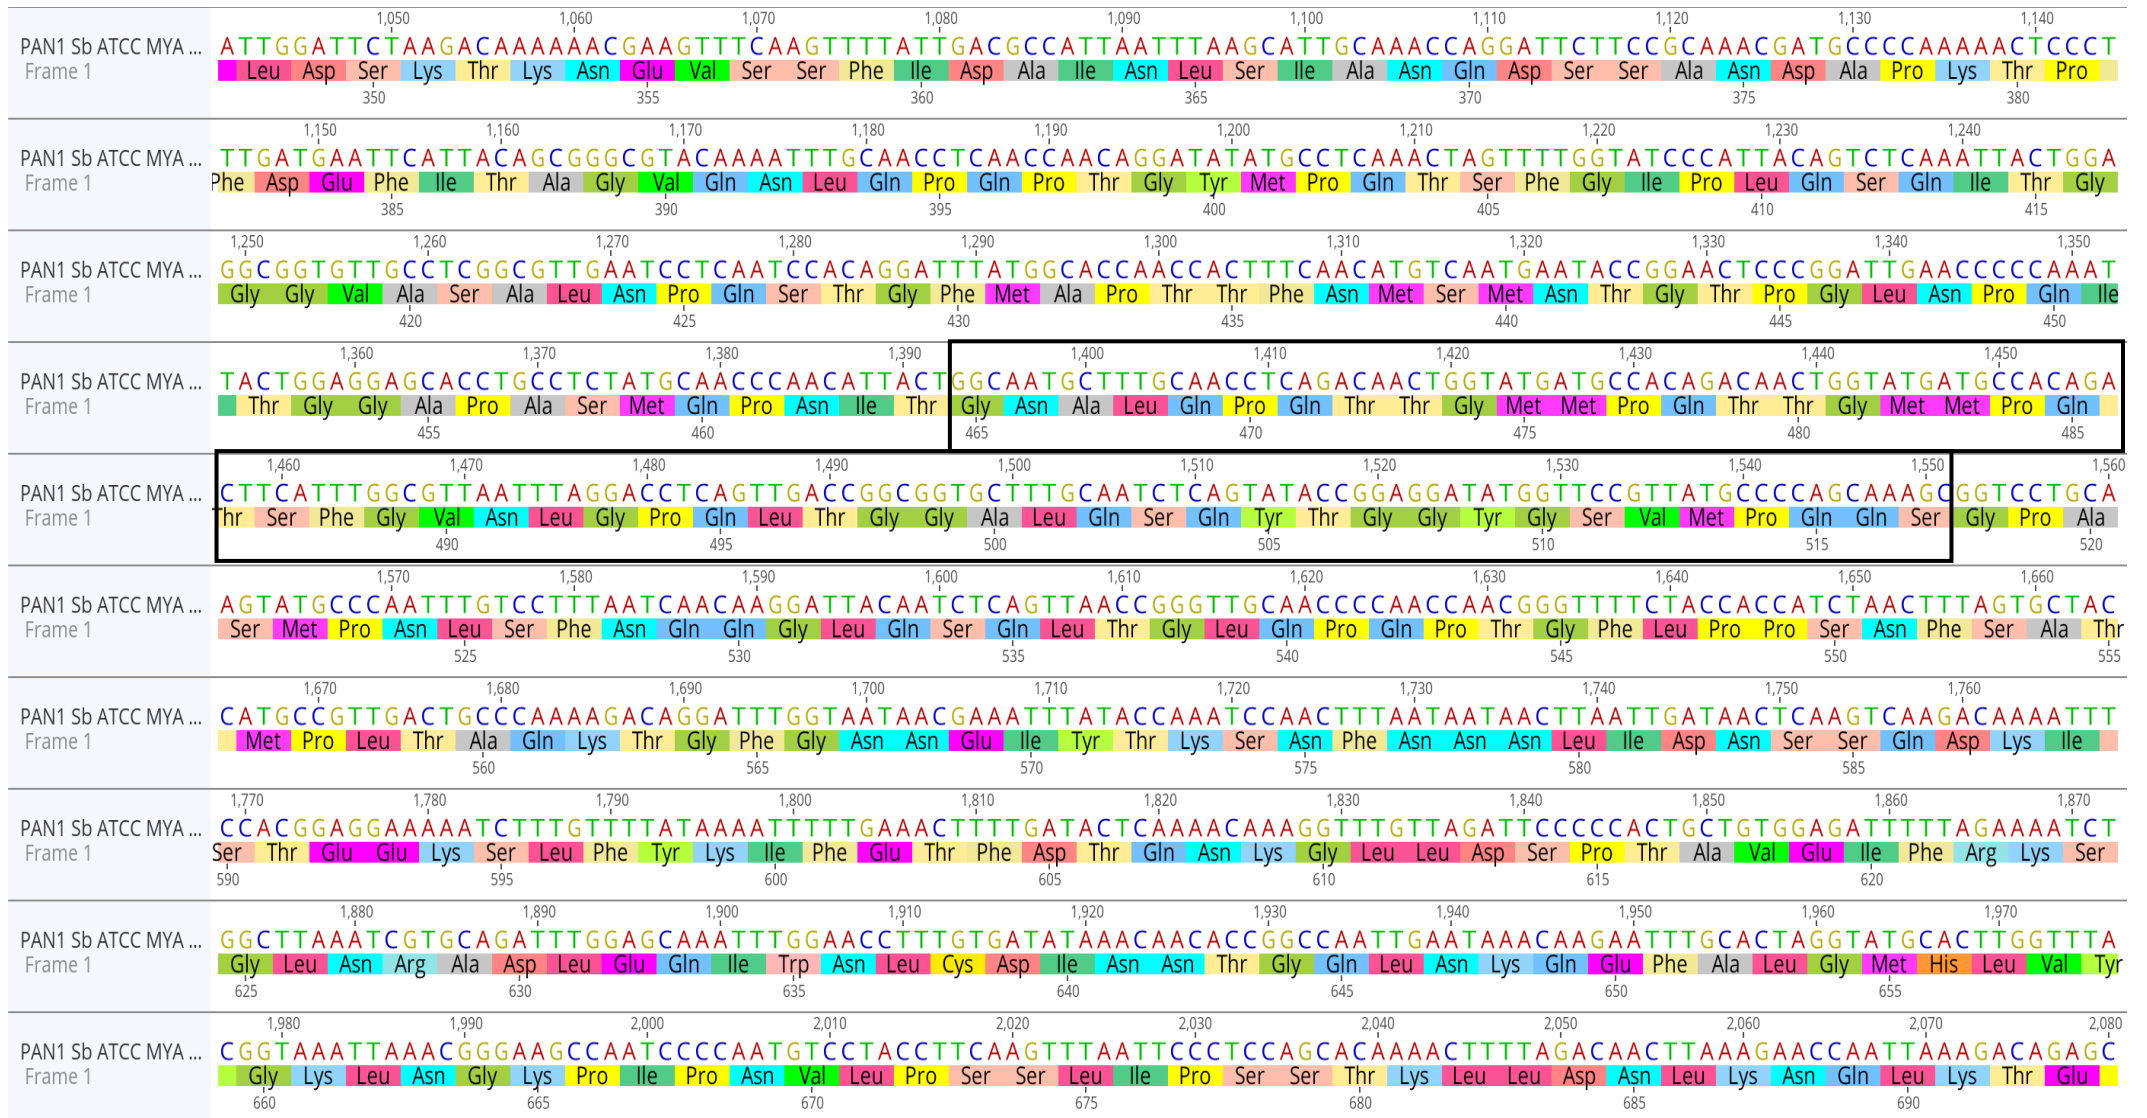

**Fig. S1** The nucleotide and amino acid sequences of the *PAN1* gene in the yeast *S. boulardii* ATCC MYA-796. The ranges of sequence starting from nucleotide position 1,393 (amino acid at 465) were used to analyze the polymorphism in various evolved Enterol strains (black box) via polymerase chain reaction (PCR) amplification technique with specific oligonucleotides, which cover the mutation site.

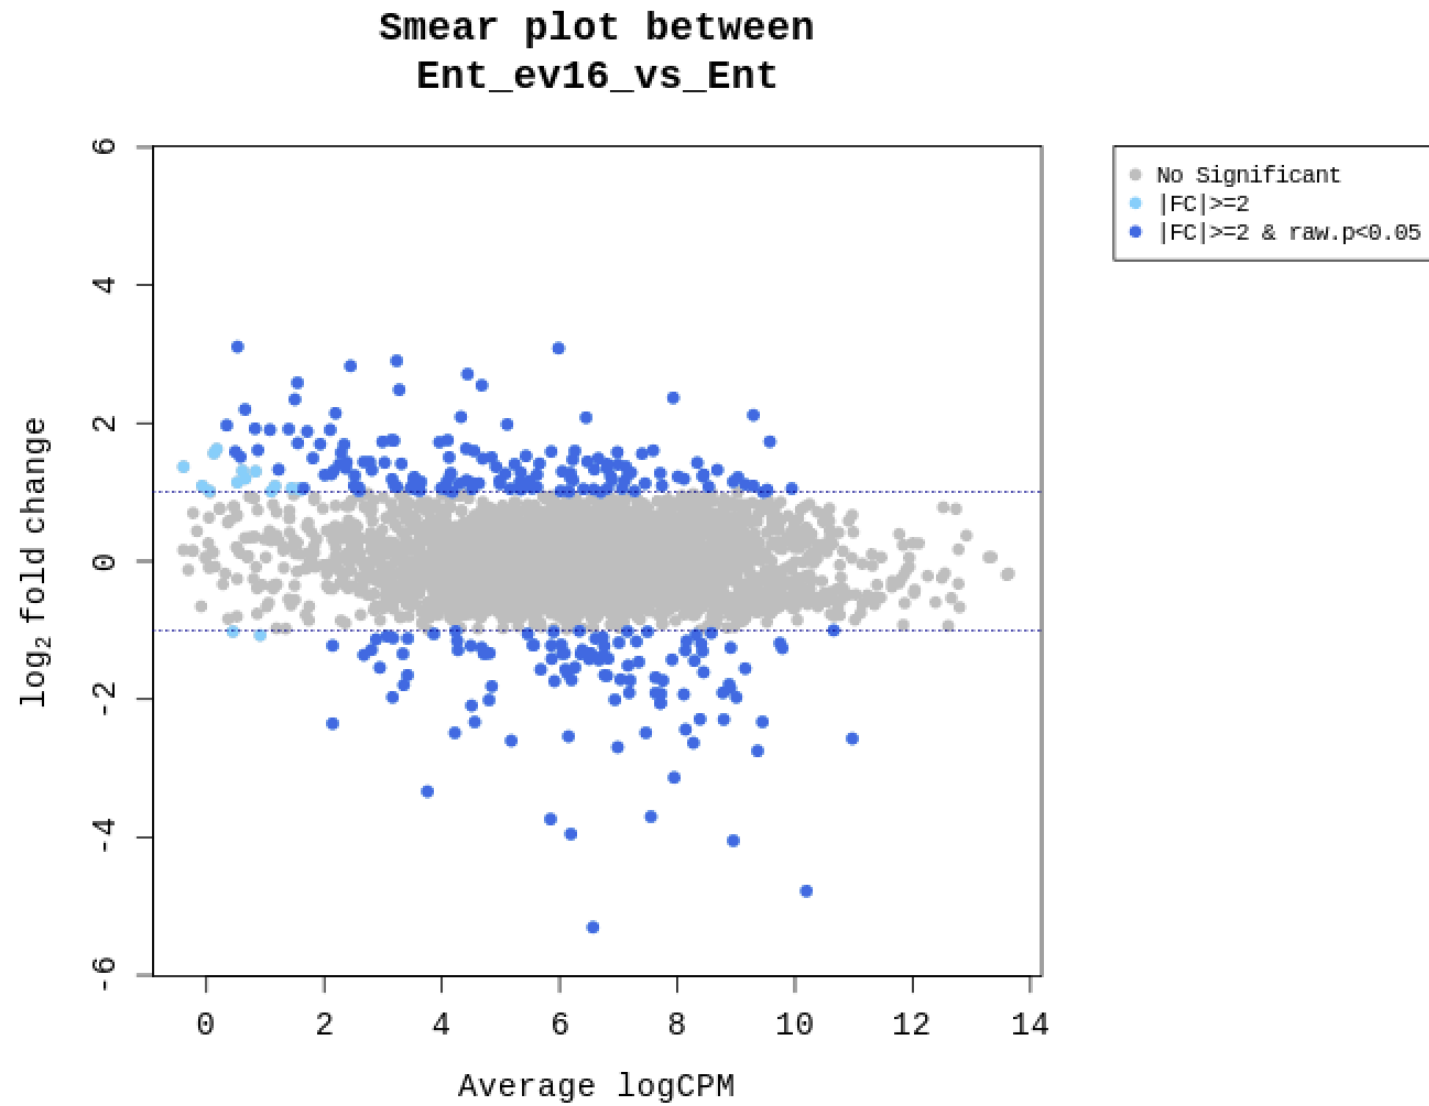

**Fig. S2** The transcripts of DEGs in Enterol ev16 versus ancestral Enterol according to the overall average expression level (Smear); a smear plot is drawn. (X-axis: Average logCPM, Y-axis: log<sub>2</sub>-fold change)
